# Supplementary material
Source: HighWire-hosted journal article supplement (http://thorax.bmjjournals.com/highwire/filestream/173902/field_highwire_adjunct_files/0/Thorax_appendix_134353.pdf)

## **SUPPLEMENT MATERIAL AND METHODS**

### **Cell culture**

The human lung fibroblasts (HFL-1) [German Collection of Microorganisms and Cell Cultures (DSMZ)] were maintained in DMEM containing 10% FCS and cultured in a humidified atmosphere of 5% CO<sub>2</sub> at 37 °C. For stimulation experiments cell were serum-starved for 24 h before treatment. Cells were treated with TGF-β1 (2 ng/ml) or WNT3a (100ng/ml) for 12 h or 24 h as indicated, and collagen content was determined by qRT-PCR and Sircol collagen assay.

### **Reverse transcription and quantitative real-time PCR**

Total RNA extraction, cDNA synthesis, and quantitative (q)RT-PCR were performed using the primers listed in Table S2. Under identical cycling conditions, all primer sets worked with similar efficiencies to obtain simultaneous amplification in the same run, as described before<sup>24</sup>. Sequences were taken from GeneBank, all accession numbers are denoted. Hydroxymethylbilane synthase (HMBS) and hypoxanthine phosphoribosyltransferase 1 (HPRT1) for mouse and human, respectively and both ubiquitously and equally expressed genes that are free of pseudogenes, were used as reference genes in all qRT-PCR reactions. Relative transcript abundance is expressed as  $\Delta\text{Ct}$  value ( $\Delta\text{Ct} = \text{Ct}^{\text{reference}} - \text{Ct}^{\text{target}}$ ), where higher  $\Delta\text{Ct}$  values indicate higher transcript abundances, and negative  $\Delta\text{Ct}$  values represent genes that are less expressed compared with the reference gene. The fold-change of the transcript levels in IPF/NSIP *versus* control can be estimated by  $2^{\Delta\Delta\text{Ct}}$ , where  $\Delta\Delta\text{Ct}$  values are calculated as  $\Delta\text{Ct}^{\text{IPF/NSIP}} - \Delta\text{Ct}^{\text{control}}$ . Positive  $2^{\Delta\Delta\text{Ct}}$  values indicate upregulation, negative values indicate downregulation of a target gene.

### **Collagen assay**

Total collagen content was determined using the Sircol Collagen Assay kit (Biocolor). Equal amounts of protein lysates were added to 1 ml of Sircol dye reagent, followed by 30 min of mixing. After centrifugation at  $10,000 \times g$  for 10 min, the supernatant was carefully aspirated and 1 ml of alkali reagent was added. Samples and collagen standards were then read at 540 nm in a spectrophotometer (Bio-Rad). Collagen concentrations were calculated using a standard curve with acid-soluble type 1 collagen.

### **Determination of terguride levels in the mouse**

Terguride levels were determined in mouse plasma and lung tissue samples by liquid chromatography-mass spectrometry (LC-MS). In brief, two lung samples each were pooled and homogenised in phosphate buffer (100 mmol/L). A 200 $\mu$ l sample of lung homogenate or plasma was then precipitated with acetonitrile (400 $\mu$ l) and centrifuged. The supernatant was dried in a vacuum centrifuge, resuspended in phosphate buffer (200 $\mu$ l), and quantitated by LC-MS using terguride standards, which were prepared on the respective matrices used for LC-MS. Proterguride was applied as an internal standard. LC-MS was carried out on a Waters 2795 Alliance Quattro Micro (Micromass/Waters) using a Luna 3 $\mu$ C18 Phenomenex column with a column temperature of 30°C. A gradient with a ternary mobile phase system consisting of water and 0.1% formic acid (mobile phase A), acetonitrile (mobile phase B), and 2% formic acid in water (mobile phase C) at a flow rate of 0.4 ml/min was applied.

### **Lung function**

Compliance was measured invasively in anaesthetized animals with the use of a commercially available system (Hugo Sachs Elektronik-Harvard apparatus, March-Hugstetten, Germany). Briefly, animals were anaesthetized by intraperitoneal injection with ketamine/xylazine (20  $\mu$ l ketamine/20  $\mu$ l xylazine/40  $\mu$ l NaCl). After deep anaesthesia was achieved, animals were

tracheotomised, intubated and artificially ventilated with room air using the above mentioned system. Lung compliance was measured for the next at least ten minutes, after which animals were euthanized by a dose of pentobarbital (100-150 mg/kg body weight). All lung tissues were excised and snap frozen, or placed in 4% (w/v) paraformaldehyde and processed for paraffin embedding.

### **Assessment of lung fibrosis**

Lung paraffin sections were stained with hematoxylin and eosin. For the quantitative histological analysis, a numeric fibrotic scale was used (Ashcroft score)<sup>26</sup>. Briefly, the grade of lung fibrosis was scored on a scale from 0 to 8 by examining more than 25 successive fields at a magnification of  $\times 100$  in a blinded fashion. The mean of all scores obtained from each field was employed as the fibrotic score of the specimen. To avoid observer bias, two experienced observers interpreted the images independently in a blinded fashion, and the mean of the observers' findings was considered to be the fibrotic score of the specimen.

### **Hydroxyproline assay**

The whole collagen content of lungs was assessed by determining the hydroxyproline levels using HPLC. Briefly, lungs were homogenized in PBS, dried, and hydrolyzed in 6 N HCl at 110 °C for 24 h. Aliquots were added to 1.4% chloramine T (Sigma), 10% n-propanol, and 0.5 M sodium acetate, pH 6.0. After 20 min of incubation at RT, 1 M p-dimethylaminobenzaldehyde (Sigma) in 70% n-propanol / 20% perchloric acid was added and the sample incubated at 65°C. The absorbance was measured at 550 nm and the amount of hydroxyproline in each sample calculated against a standard curve.

## SUPPLEMENT TABLES

**Table S1.** Characteristics of patients. VC = vital capacity, TLC = total lung capacity, DL<sub>CO</sub>/VA = diffusing capacity of the lung for CO per unit of alveolar volume (all in % predicted), Pa<sub>O<sub>2</sub></sub>/CO<sub>2</sub> = partial pressure of O<sub>2</sub>/CO<sub>2</sub> in the arterial blood.

| No. | Diagnosis | Gender | Age (yr) | VC (%) | DL <sub>CO</sub> /VA (%) | TLC (%) | O <sub>2</sub> (l/min) | Pa <sub>O<sub>2</sub></sub> (mmHg) | Pa <sub>CO<sub>2</sub></sub> (mmHg) |
|-----|-----------|--------|----------|--------|--------------------------|---------|------------------------|------------------------------------|-------------------------------------|
| 1   | IPF (UIP) | male   | 63       | 56%    | 33%                      | 48%     | 3                      | 52                                 | 33                                  |
| 2   | IPF (UIP) | male   | 62       | 50%    | 26%                      | 52%     | 3                      | 49                                 | 38                                  |
| 3   | IPF (UIP) | male   | 65       | 59%    | 20%                      | 42%     | 3                      | 53                                 | 38                                  |
| 4   | IPF (UIP) | male   | 65       | 59%    | 20%                      | 42%     | 4                      | 69                                 | 41                                  |
| 5   | IPF (UIP) | male   | 43       | 48%    | 27%                      | 51%     | na                     | na                                 | na                                  |
| 6   | IPF (UIP) | male   | 64       | 59%    | 22%                      | 52%     | 2                      | 58                                 | 38                                  |
| 7   | IPF (UIP) | male   | 65       | 51%    | 20%                      | 66%     | 2                      | 53                                 | 38                                  |
| 8   | IPF (UIP) | male   | 44       | 47%    | 25%                      | 55%     | 2                      | 36                                 | 35                                  |
| 9   | IPF (UIP) | female | 43       | 40%    | na                       | na      | 2                      | 54                                 | 35                                  |
| 10  | IPF (UIP) | female | 42       | 50%    | 17%                      | 58%     | 3                      | 52                                 | 36                                  |
| 11  | IPF (UIP) | female | 66       | 29%    | 23%                      | 45%     | 4                      | 56                                 | 45                                  |
| 12  | IPF (UIP) | female | 62       | 27%    | na                       | 48%     | 4                      | 71                                 | 65                                  |
| 1   | NSIP      | male   | 60       | 36%    | 27%                      | 41%     | 6                      | 51                                 | 45                                  |
| 2   | NSIP      | male   | 57       | 35%    | na                       | 43%     | 8                      | 53                                 | 59                                  |
| 3   | NSIP      | male   | 35       | 35%    | 28%                      | 41%     | na                     | na                                 | na                                  |
| 4   | NSIP      | male   | 63       | na     | na                       | na      | 4                      | 56                                 | 36                                  |
| 5   | NSIP      | female | 47       | 41%    | 36%                      | 50%     | na                     | na                                 | na                                  |
| 6   | NSIP      | female | 66       | 33%    | 30%                      | 45%     | 6                      | 56                                 | 43                                  |

**Table S2.** Primer sequences and amplicon sizes for human and mouse tissues.

| Gene    | Accession |     | Sequences (5' → 3')                   | Length | Amplicon |
|---------|-----------|-----|---------------------------------------|--------|----------|
| 5-HTR1A | NM000524  | for | AGG CTG GTC CTA CCC CTT GT            | 20 bp  | 59bp     |
|         |           | rev | CGG CGT TGC GCT CAT T                 | 16 bp  |          |
| 5-HTR1B | NM000863  | for | GGG CCA GGT GGT CTG TGA               | 18 bp  | 58bp     |
|         |           | rev | TGG AGG CAG TGC AAC AAG TG            | 20 bp  |          |
| 5-HTR2A | NM000621  | for | AGC TGA TAT GCT GCT GGG TTT C         | 22 bp  | 69bp     |
|         |           | rev | CCA CCG GTA CCC ATA CAG GAT           | 21 bp  |          |
| 5-HTR2B | NM000867  | for | CTC ACG GGC TAC AGC ATT CAT           | 21 bp  | 98bp     |
|         |           | rev | TCC ACA TCA GTC TCT ATC CCT TTA ATA G | 28 bp  |          |
| 5-HTR2C | NM000868  | for | GCC AAC TGA CGC CAT CCT               | 18 bp  | 131bp    |
|         |           | rev | ACC GCA TTC CTC AGG TTC AC            | 20 bp  |          |
| 5-HTT   | NM001045  | for | GAA ACC CAA TTG GCA GAA ACT C         | 22 bp  | 145bp    |
|         |           | rev | GGG CAT CTT GGT AGC AGT TGT T         | 22 bp  |          |
| HPRT    | NM000194  | for | AAG GAC CCC ACG AAG TGT TG            | 20 bp  | 157bp    |
|         |           | rev | GGC TTT GTA TTT TGC TTT TCC A         | 22 bp  |          |
| 5-Htr1a | NM008308  | for | CCCAATTCTTCACGATGGAAGT                | 22bp   | 91bp     |
|         |           | rev | GGCATGGTAGATGTCCATACAGTTT             | 25bp   |          |
|         |           | for | CACGCTCTCCAACGCCTTT                   | 19 bp  |          |

|         |          |     |                               |       |       |
|---------|----------|-----|-------------------------------|-------|-------|
|         |          | rev | ACTGCCAGAGAGGGCGATCAG         | 21 bp |       |
| 5-Htr2a | NM172812 | for | TTGTCATGCCCCGTGTCCAT          | 19 bp | 97bp  |
|         |          | rev | AAGAGCACATCCAGGTAAATCCA       | 23 bp |       |
| 5-Htr2b | NM008312 | for | ACAGGACGGCTGGCTTAGG           | 19 bp | 128bp |
|         |          | rev | TCTCGAAGATGGGACTGTGTACAC      | 24 bp |       |
| 5-Htr2c | NM008312 | for | TGCTGATATGCTGGTGGGACTA        | 22 bp | 149bp |
|         |          | rev | CGCAGAGGTGCATGATGGA           | 19 bp |       |
| 5-Htt   | NM010484 | for | AGCGACGTGAAGGAAATGCT          | 20 bp | 98bp  |
|         |          | rev | CTGCAAATGATGAACAGGAGAAAC      | 24 bp |       |
| Hmbs    | NM013551 | for | ATG TCC GGT AAC GGC GGC       | 18bp  | 135bp |
|         |          | rev | GGT ACA AGG CTT TCA GCA TCG C | 22bp  |       |

## SUPPLEMENT FIGURE LEGENDS

### Figure S1

The mRNA expression profile of 5-HT-receptors (5-HTR) and the serotonin transporter 5-HTT in lung samples from bleomycin- or saline-treated mice 7 or 14 days after injury, as indicated. The mRNA levels of 5-HTR<sub>1a,1b</sub>, 5-HTR<sub>2a-c</sub>, and the serotonin transporter 5-HTT were assessed by quantitative real-time PCR (qRT-PCR). Results are derived from n = 4 per group and presented as fold change compared with the respective saline control, \* p < 0.05.

### Figure S2

Expression and localization of 5-HTR<sub>2B</sub> in lung tissues. Additional immunohistochemical stainings of donor and IPF patients using the HPA012867 antibody, as described in detail in Material and Methods. Scale bars indicate 100µm.

### Figure S3

Application of the 5-HTR<sub>2A/B</sub> antagonist terguride *in vivo*. (A) The chemical structure of terguride. (B) Mice were subjected to a single inhalative instillation of bleomycin. After 7, 14, or 21 days, the 5-HTR<sub>2A/B</sub> antagonist terguride was applied intraperitoneally (i.p.) and the concentration of terguride in plasma and lung tissues were determined. (C) Body weight was assessed at the indicated time points.

### Figure S4

The treatment scheme for the therapeutic approach *in vivo*. Mice were subjected to a single inhalative application of bleomycin, which led to the development of lung fibrosis by day 14 - 21 after an initial inflammatory phase (day 3 - 7). Treatment with terguride was initiated 14 days after bleomycin instillation, using the indicated concentrations, via intraperitoneal (i.p.) application twice daily until day 28. As an internal control, a treatment arm with daily

administration of 50 mg/kg BW imatinib was included in the study. Treatment of imatinib was started immediately following instillation of bleomycin (n=10 for each group).

Figure S1

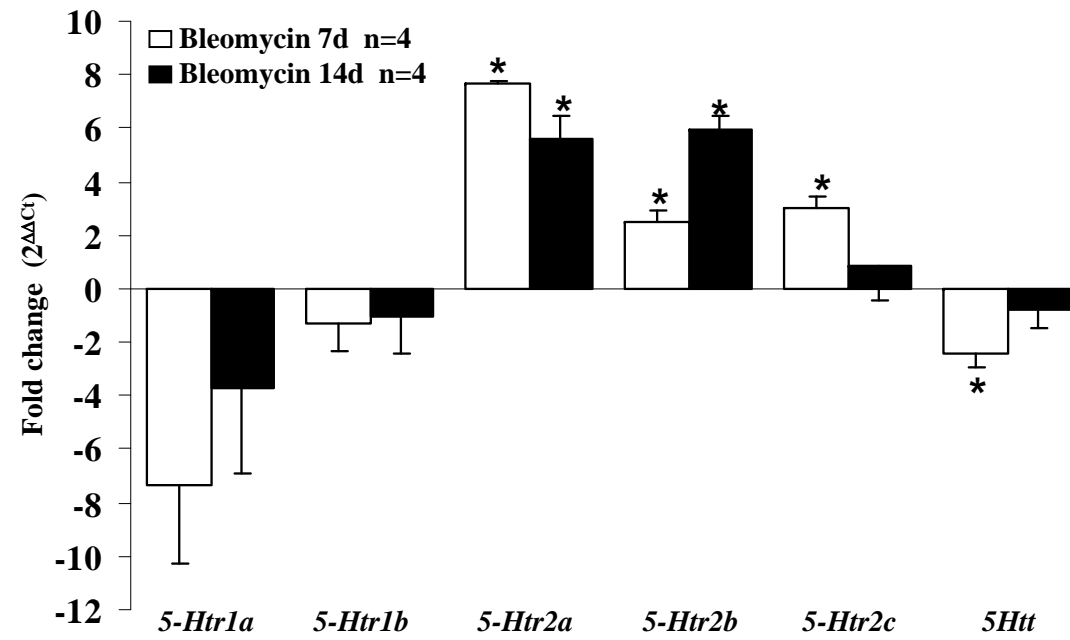



**Figure S2**

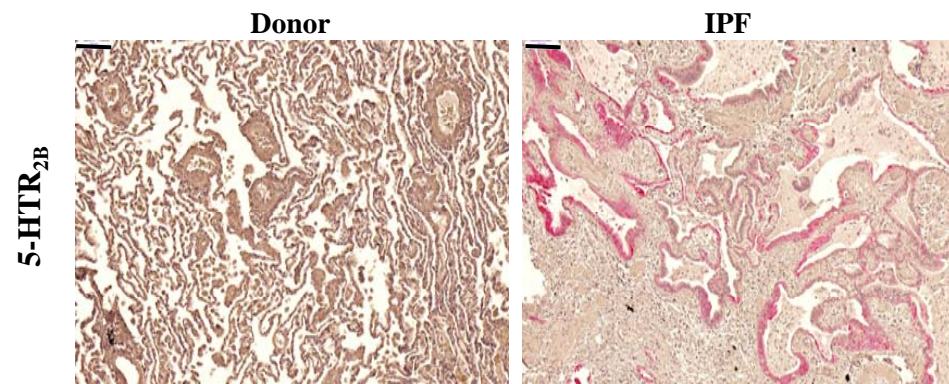

Figure S3

A

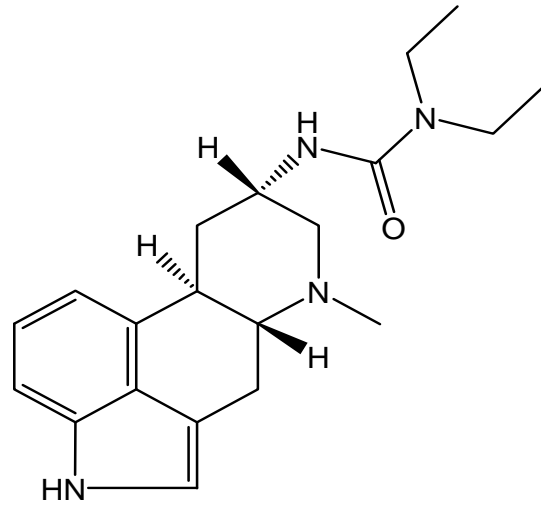

B

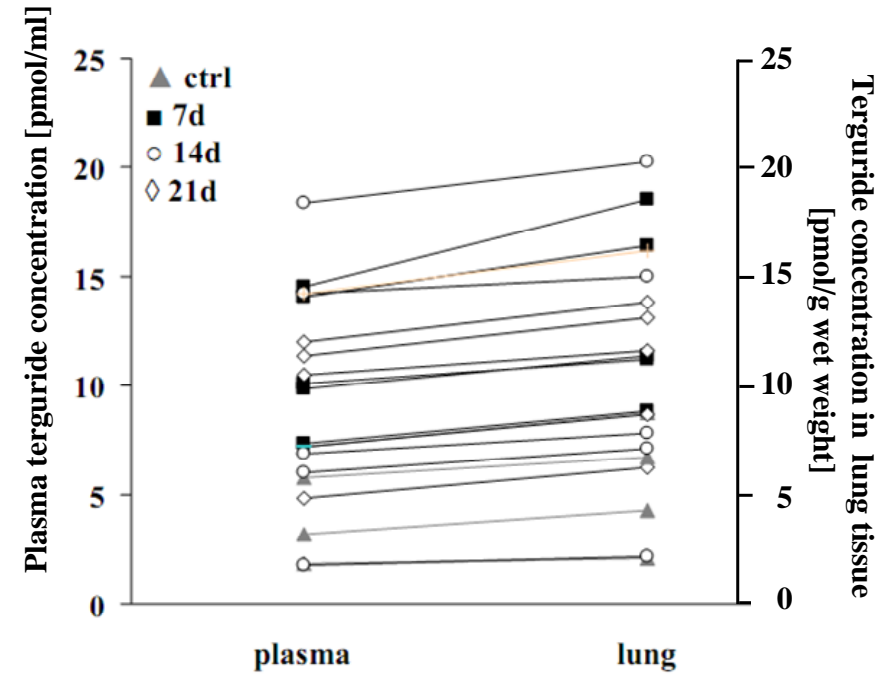

C

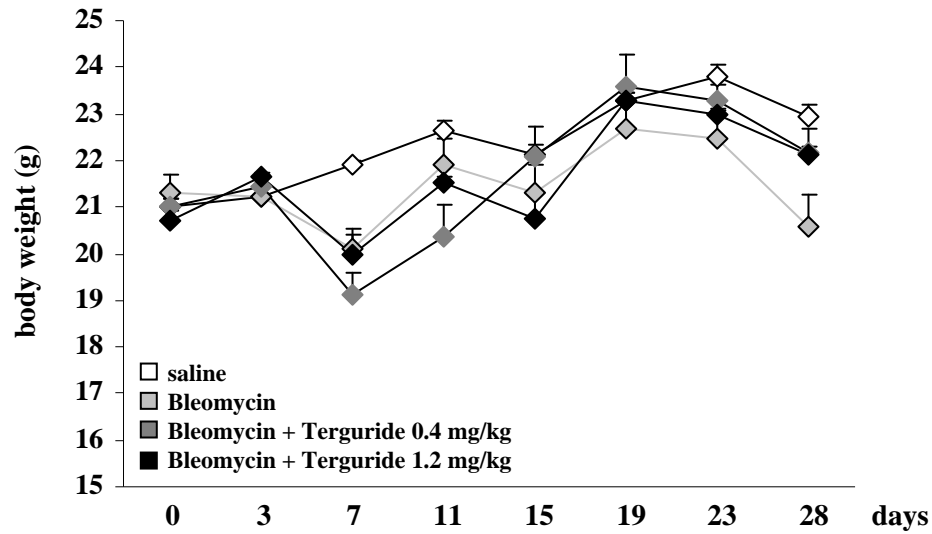

**Figure S4**

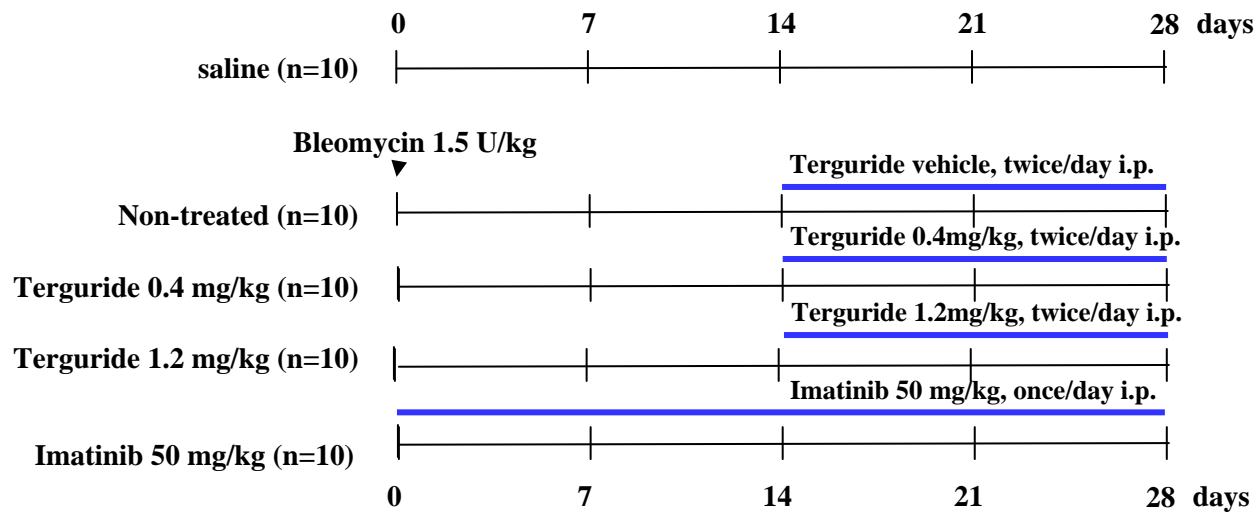

Supplement: Thorax_appendix_134353.pdf [file Thorax_appendix_134353.pdf]
